# Supplementary material for: The Effect of Maternal Depression on Infant Attachment: A Systematic Review
Source: MDPI journal article supplement (doi:10.3390/ijerph17082675), 2020-04-14
Supplement: s1 [file s1]

**Table S1.** The Quality assessment scores.

| Study                        | Adeq-uate Sample (rev1) | Adeq-uate Sample (rev2) | Repre-Sentative (rev1) | Repre-Sentative (rev2) | Attrition (rev1) | Attrition (rev2) | Methods (rev1) | Methods (rev2) | Exper-ience (rev1) | Exper-ience (rev2) | Statistics (rev1) | Statistics (rev2) | Double Blind (rev1) | Double Blind (rev2) | Conclu-sion (rev1) | Conclu-sion (rev2) | Direct/Indi-rect (rev1) | Direct/Indi-rect (rev2) |
|------------------------------|-------------------------|-------------------------|------------------------|------------------------|------------------|------------------|----------------|----------------|--------------------|--------------------|-------------------|-------------------|---------------------|---------------------|--------------------|--------------------|-------------------------|-------------------------|
| Beeghly et al. [55]          | 1                       | 1                       | 0                      | 0                      | 1                | 1                | 1              | 1              | 1                  | 1                  | 1                 | 1                 | 1                   | 1                   | 1                  | 1                  | 1                       | 1                       |
| Bergman et al. [46]          | 1                       | 1                       | 1                      | 1                      | -1               | -1               | 1              | 1              | 1                  | 1                  | 1                 | 1                 | 0                   | 1                   | 1                  | 1                  | 1                       | 0                       |
| Biegelow et al. [56]         | -1                      | -1                      | 1                      | 1                      | -1               | -1               | 1              | 1              | 1                  | 1                  | 1                 | 1                 | 1                   | 1                   | 1                  | 1                  | 1                       | 1                       |
| Carter et al. [24]           | -1                      | -1                      | 1                      | 1                      | -1               | -1               | 1              | 1              | 1                  | 1                  | 1                 | 1                 | 1                   | 1                   | 1                  | 1                  | 1                       | 1                       |
| Cicchetti et al. [57]        | 1                       | 1                       | -1                     | -1                     | 1                | 1                | 1              | 1              | 0                  | 0                  | 1                 | 1                 | 0                   | 0                   | 1                  | 1                  | 1                       | 1                       |
| Clarke-Stewart et al. [47]   | 1                       | 1                       | 1                      | 1                      | 1                | 1                | 1              | 1              | 1                  | 1                  | 1                 | 1                 | 1                   | 0                   | 1                  | 1                  | 1                       | 1                       |
| De Falco et al. [48]         | -1                      | -1                      | -1                     | -1                     | 1                | 1                | 1              | 1              | 1                  | 1                  | 0                 | 0                 | 0                   | 0                   | 1                  | 1                  | -1                      | -1                      |
| Donovan, Leavitt [58]        | -1                      | -1                      | 0                      | 0                      | 1                | 1                | 1              | 1              | 1                  | 1                  | 1                 | 1                 | 1                   | 1                   | 1                  | 1                  | 1                       | 1                       |
| Edhborg et al. [49]          | -1                      | -1                      | 0                      | 0                      | -1               | -1               | 1              | 1              | 1                  | 1                  | 1                 | 1                 | 1                   | 1                   | 1                  | 1                  | 1                       | 1                       |
| Gratz et al. [37]            | -1                      | -1                      | -1                     | -1                     | 1                | 1                | 1              | 1              | 1                  | 1                  | 1                 | 1                 | 1                   | 1                   | 0                  | 1                  | -1                      | -1                      |
| Gravener et al. [38]         | 1                       | 1                       | 0                      | -1                     | 0                | 0                | 1              | 1              | 1                  | 1                  | 1                 | 1                 | 1                   | 1                   | 1                  | 1                  | 1                       | 1                       |
| Hayes et al. [42]            | 1                       | 1                       | -1                     | -1                     | 0                | 0                | 1              | 1              | 0                  | 0                  | 1                 | 1                 | 0                   | 0                   | 1                  | 1                  | 1                       | 1                       |
| Hughers et al. [45]          | 1                       | 1                       | 1                      | 1                      | -1               | -1               | 1              | 1              | 1                  | 1                  | 1                 | 1                 | 1                   | 1                   | 1                  | 1                  | 1                       | 1                       |
| Laurent, Ablow et al. [39]   | -1                      | -1                      | -1                     | -1                     | 0                | 0                | 1              | 1              | 1                  | 1                  | 1                 | 1                 | 1                   | 1                   | 1                  | 1                  | 1                       | 1                       |
| Ludmer et al. [40]           | 1                       | 1                       | -1                     | -1                     | 0                | 0                | 1              | 1              | 1                  | 1                  | 1                 | 1                 | 1                   | 1                   | 1                  | 1                  | -1                      | -1                      |
| Lyons-Ruth et al. [41]       | 1                       | 1                       | -1                     | -1                     | 0                | 0                | 1              | 1              | 0                  | 0                  | 1                 | 1                 | 1                   | 1                   | 1                  | 1                  | 1                       | 1                       |
| Lyons-Ruth et al. [33]       | -1                      | -1                      | 1                      | 1                      | 0                | 0                | 1              | 1              | 1                  | 1                  | 1                 | 1                 | 1                   | 1                   | 1                  | 1                  | 0                       | 0                       |
| McMahon et al. [52]          | 1                       | 1                       | 1                      | 1                      | 1                | 1                | 1              | 1              | 1                  | 1                  | 1                 | 1                 | 1                   | 1                   | 1                  | 1                  | 1                       | 1                       |
| Measelle, Ablow et al. [53]  | -1                      | -1                      | -1                     | -1                     | 0                | 0                | 1              | 1              | 1                  | 1                  | 1                 | 1                 | 1                   | 1                   | 1                  | 1                  | -1                      | -1                      |
| Mehler et al. [50]           | 0                       | 0                       | -1                     | -1                     | 1                | 1                | 1              | 1              | 0                  | 0                  | 1                 | 1                 | 1                   | 1                   | 1                  | 1                  | 1                       | 1                       |
| Murray [43]                  | -1                      | -1                      | 1                      | 1                      | 1                | 1                | 1              | 1              | 0                  | 0                  | -1                | -1                | 0                   | 0                   | 0                  | 1                  | 1                       | 1                       |
| Righetti-Veltema et al. [59] | 1                       | 1                       | 0                      | 0                      | -1               | -1               | 1              | 1              | 0                  | 0                  | 1                 | 1                 | 1                   | 1                   | 1                  | 1                  | 1                       | 1                       |
| Sagi et al. [51]             | 1                       | 1                       | 1                      | 1                      | 1                | 1                | 1              | 1              | 1                  | 1                  | 1                 | 1                 | 1                   | 1                   | 1                  | 1                  | 1                       | 1                       |
| Smith-Nielsen et al. [60]    | -1                      | -1                      | -1                     | -1                     | 1                | 1                | 1              | 1              | 1                  | 1                  | 1                 | 1                 | 1                   | 1                   | 1                  | 1                  | 1                       | 1                       |
| Tarabulsy et al. [54]        | 1                       | 1                       | -1                     | -1                     | 0                | 0                | 1              | 1              | 1                  | 1                  | 1                 | 1                 | 0                   | 0                   | 1                  | 1                  | 1                       | 1                       |
| Tharner et al. [44]          | 1                       | 1                       | 1                      | 1                      | 1                | 1                | 1              | 1              | 1                  | 1                  | 1                 | 1                 | 1                   | 1                   | 1                  | 1                  | 1                       | 1                       |
| Tomlinson et al. [61]        | 1                       | 1                       | -1                     | -1                     | 1                | 1                | 1              | 1              | 0                  | 1                  | 1                 | 1                 | 1                   | 1                   | 1                  | 1                  | 1                       | 1                       |
| Toth et al. [62]             | 1                       | 1                       | 1                      | 1                      | -1               | -1               | 1              | 1              | 1                  | 1                  | 1                 | 1                 | 1                   | 1                   | 1                  | 1                  | 1                       | 1                       |
| Zaslow et al. [63]           | 1                       | 1                       | 1                      | 1                      | 1                | 1                | 1              | 1              | 0                  | 0                  | 1                 | 1                 | 0                   | 0                   | 1                  | 1                  | 1                       | 1                       |

**Criteria used:** (1) adequate sample: more than 30 participants in each group; (2) representative: sample which vary in demographic characteristics; (3) attrition rate: below 30% of initial sample; (4) validated methods: standardized methods with proper adaptation; (5) experience: the coders possessed training and experience in assessing attachment; (6) statistics: appropriately described and correct; (7) double blind: double-blind procedure in the attachment assessment; (8) conclusion: consistent with the results; (9) direct/indirect: aim of the study had direct assessment of the influence of depression on attachment style. The quality of the research was evaluated using a points system (+1 = yes, 0 = unclear, -1 = no) for all specified criteria. The maximum amount of points that a study could achieve was 9 and the minimum was 0: a possible evaluation below zero would be awarded a value of 0.
